# Supplementary material
Source: Springer Nature journal article supplement (https://www.springermedizin.de/resource/supplementary/13221_2011_19_MOESM4_ESM.pdf/9680778)

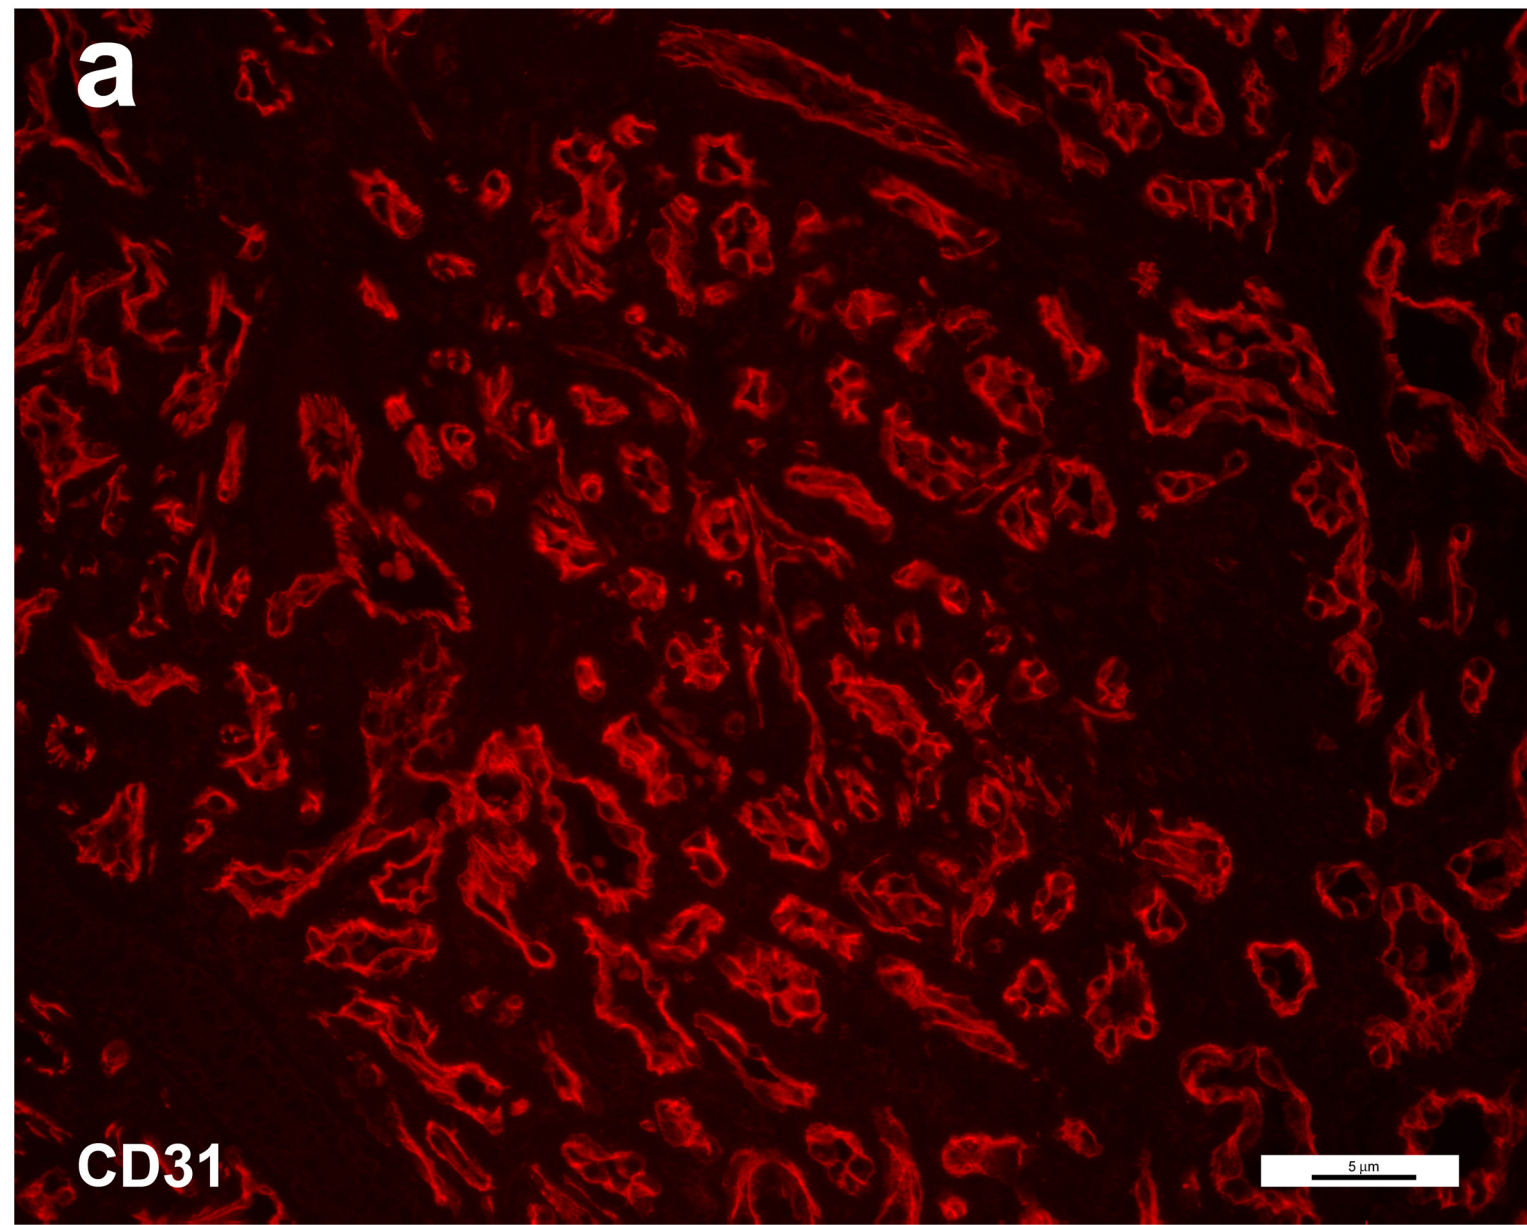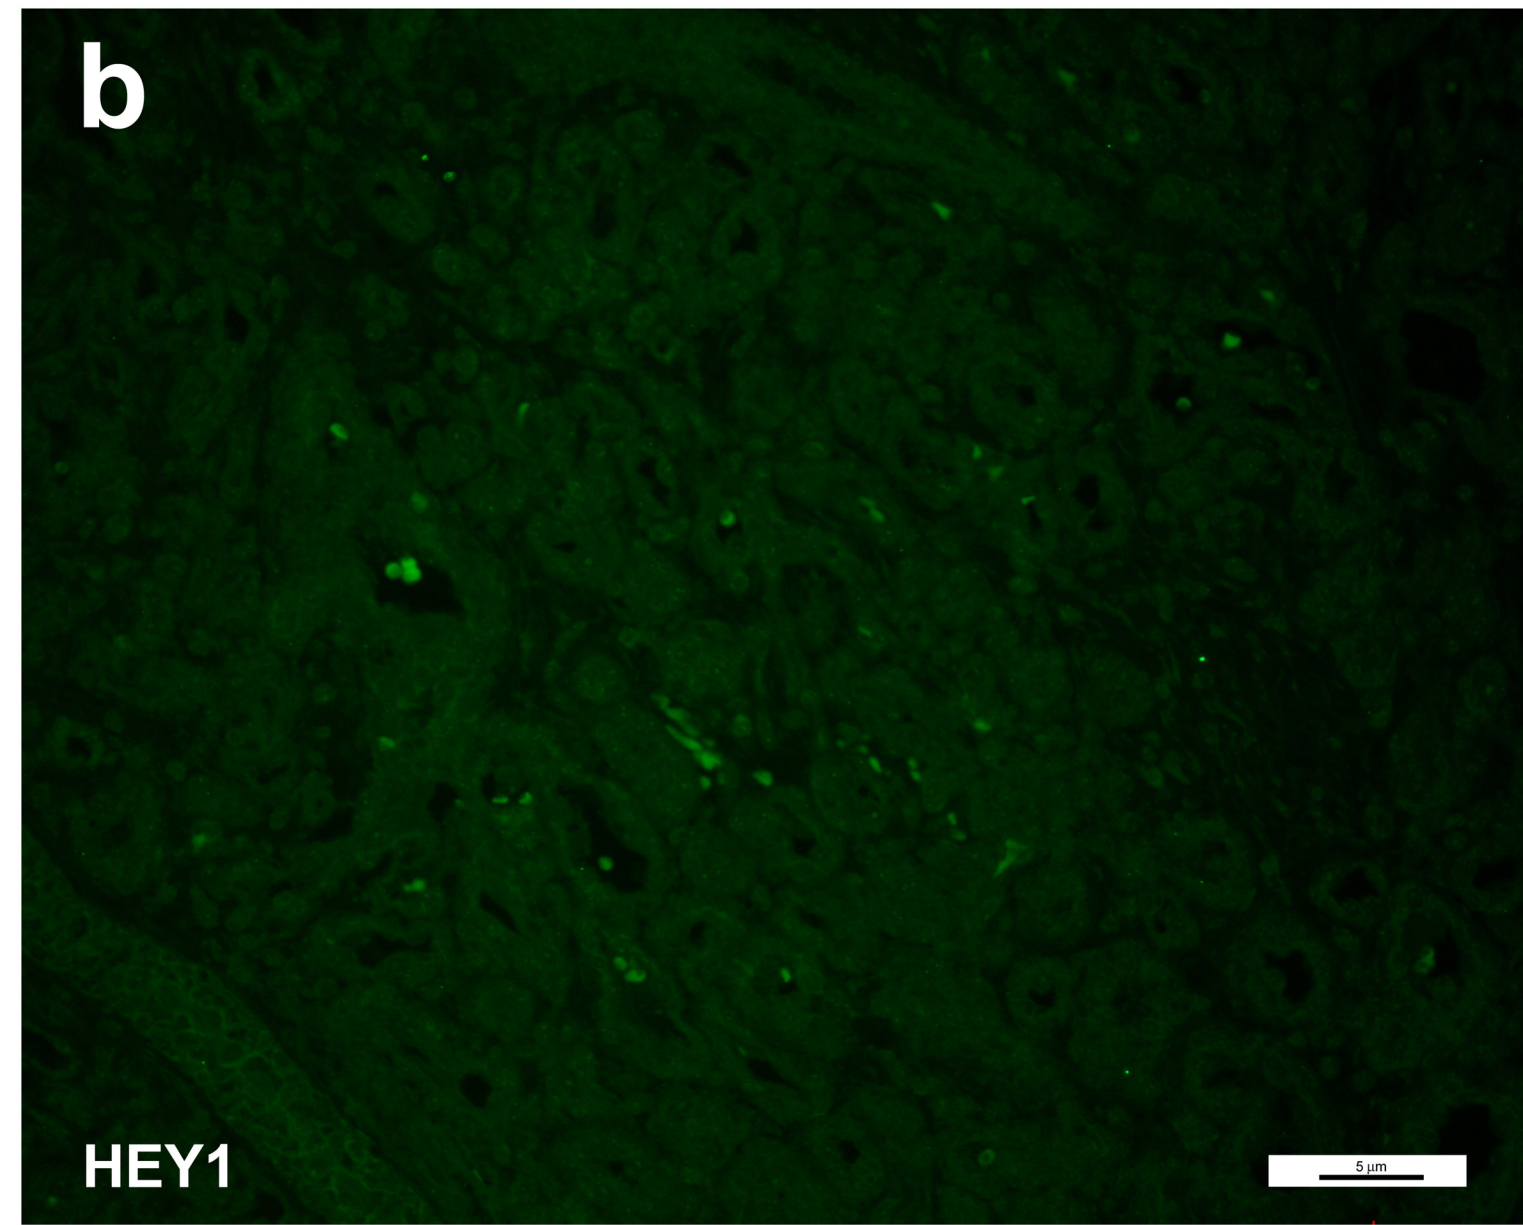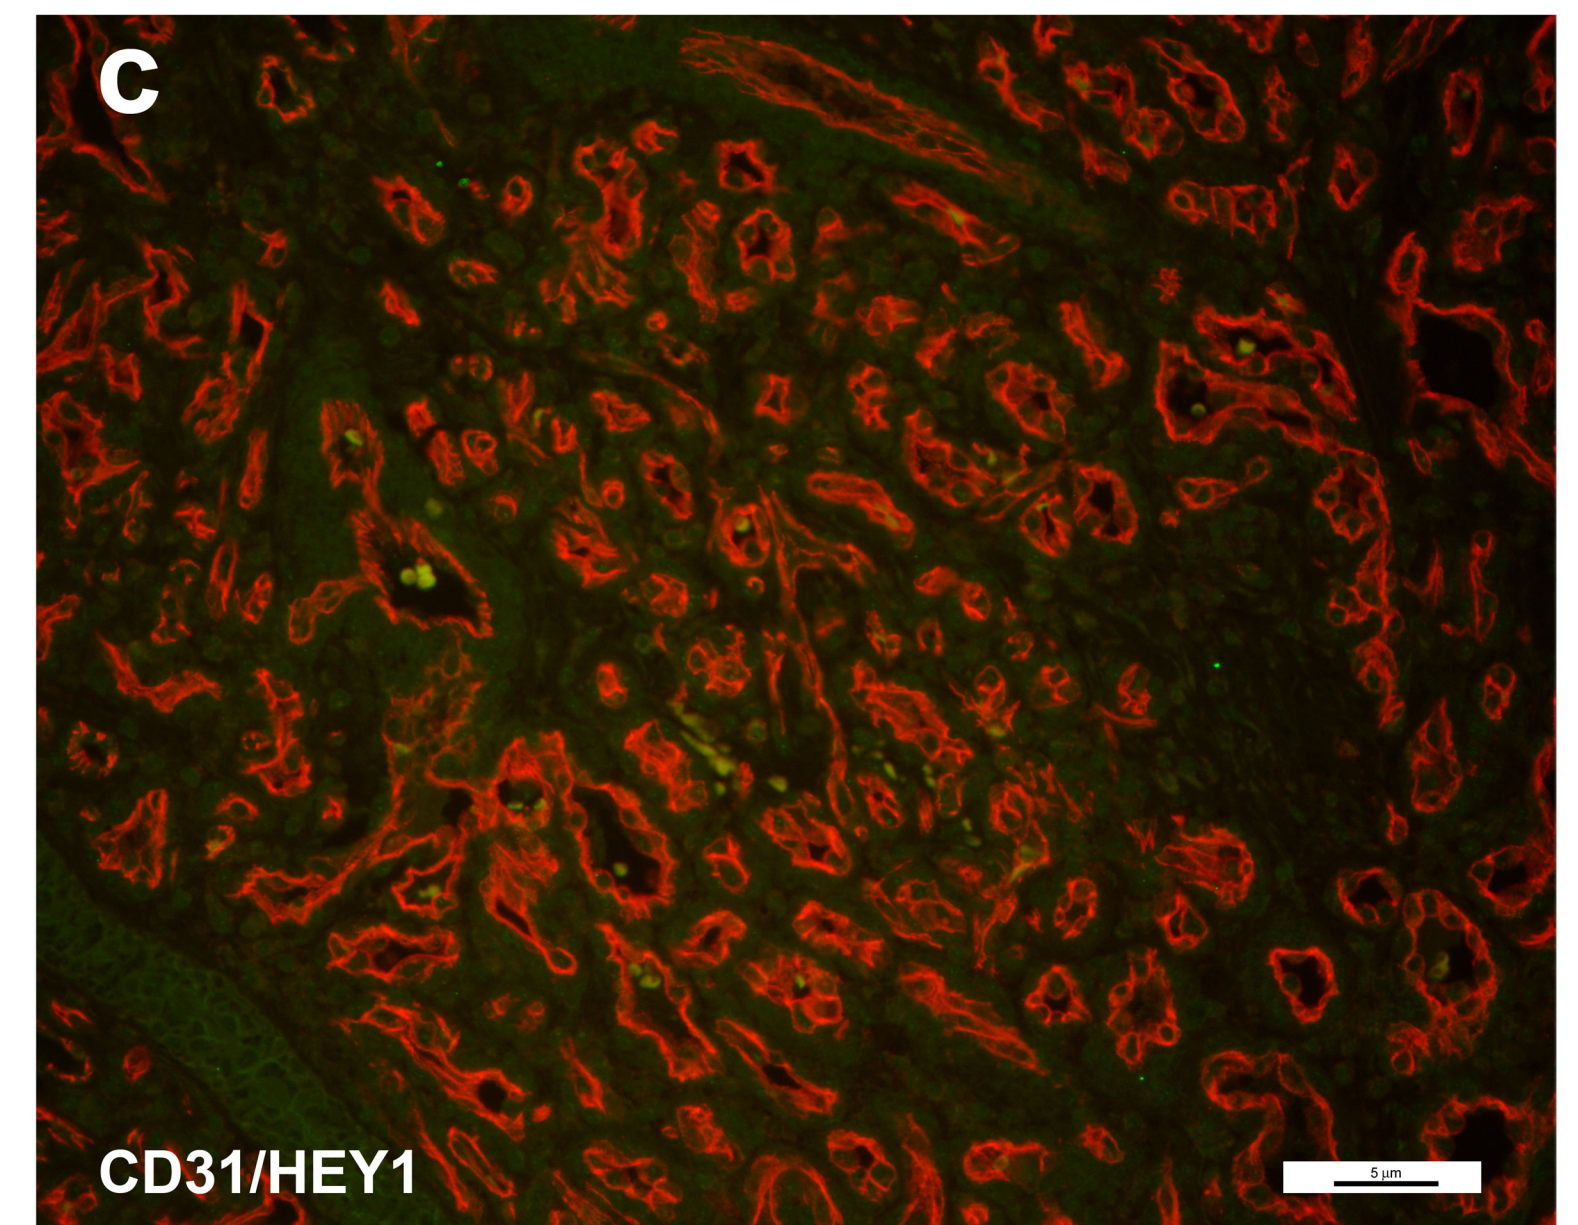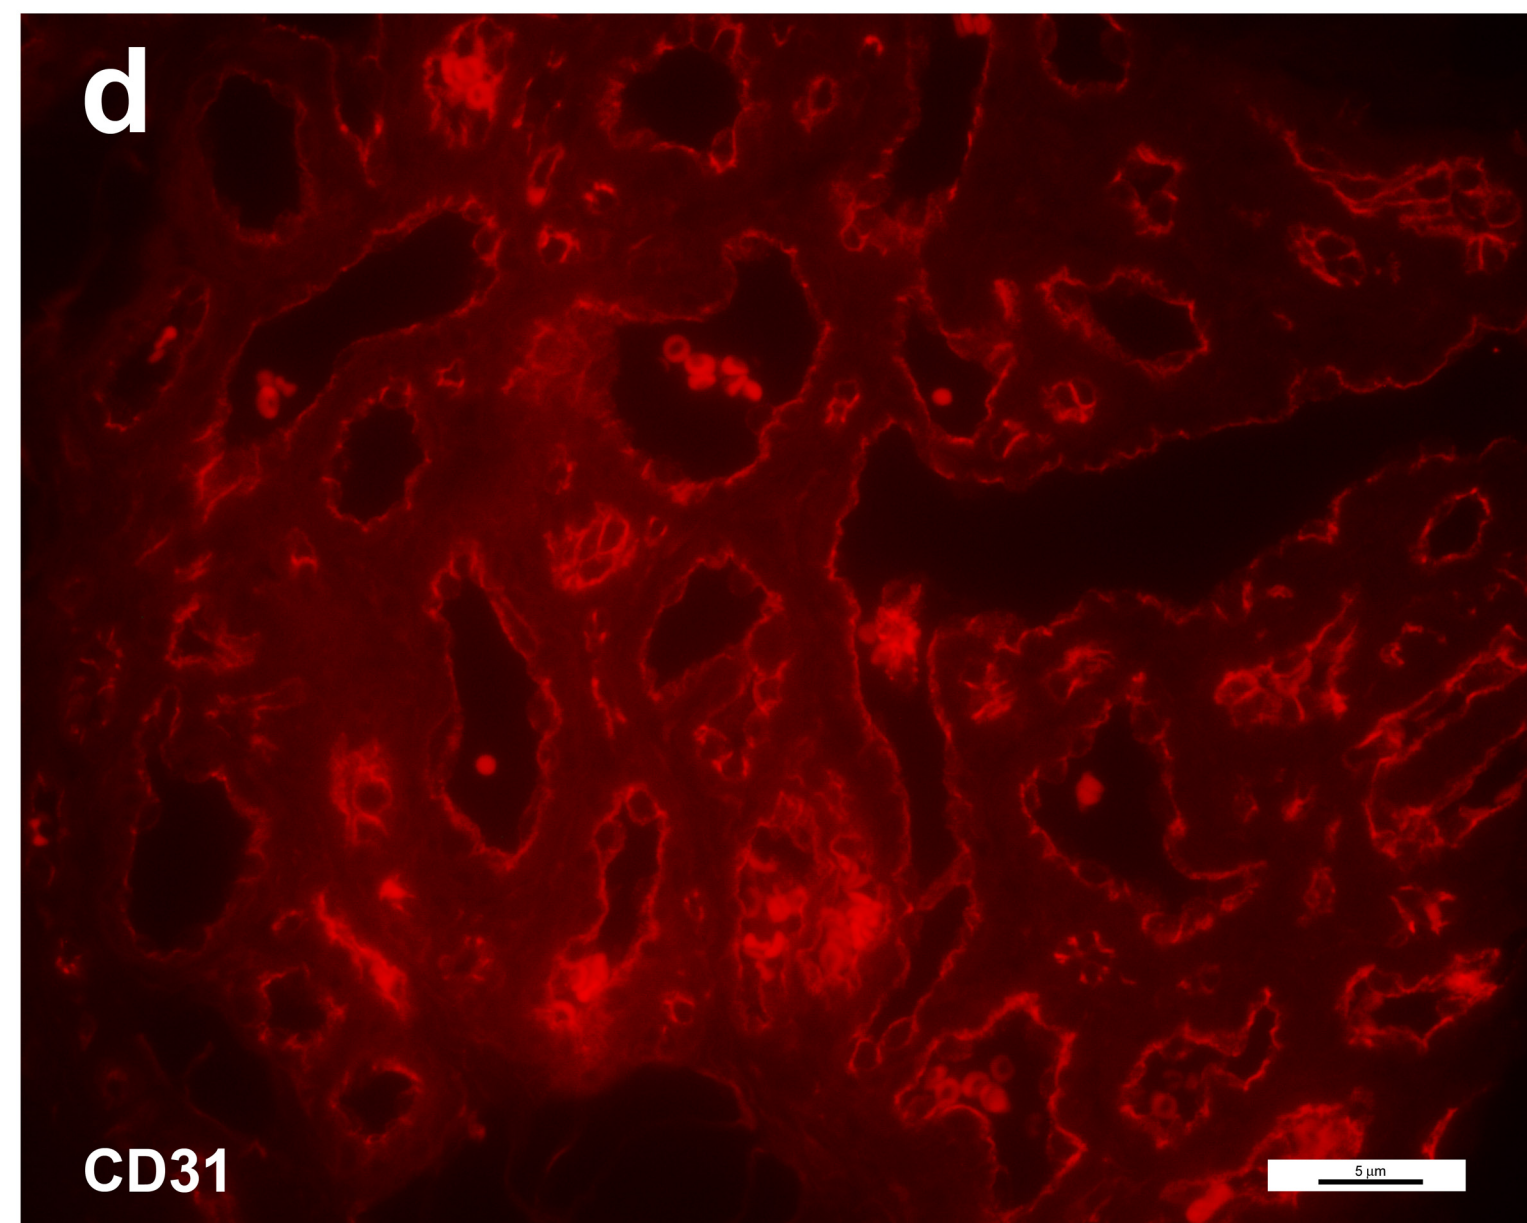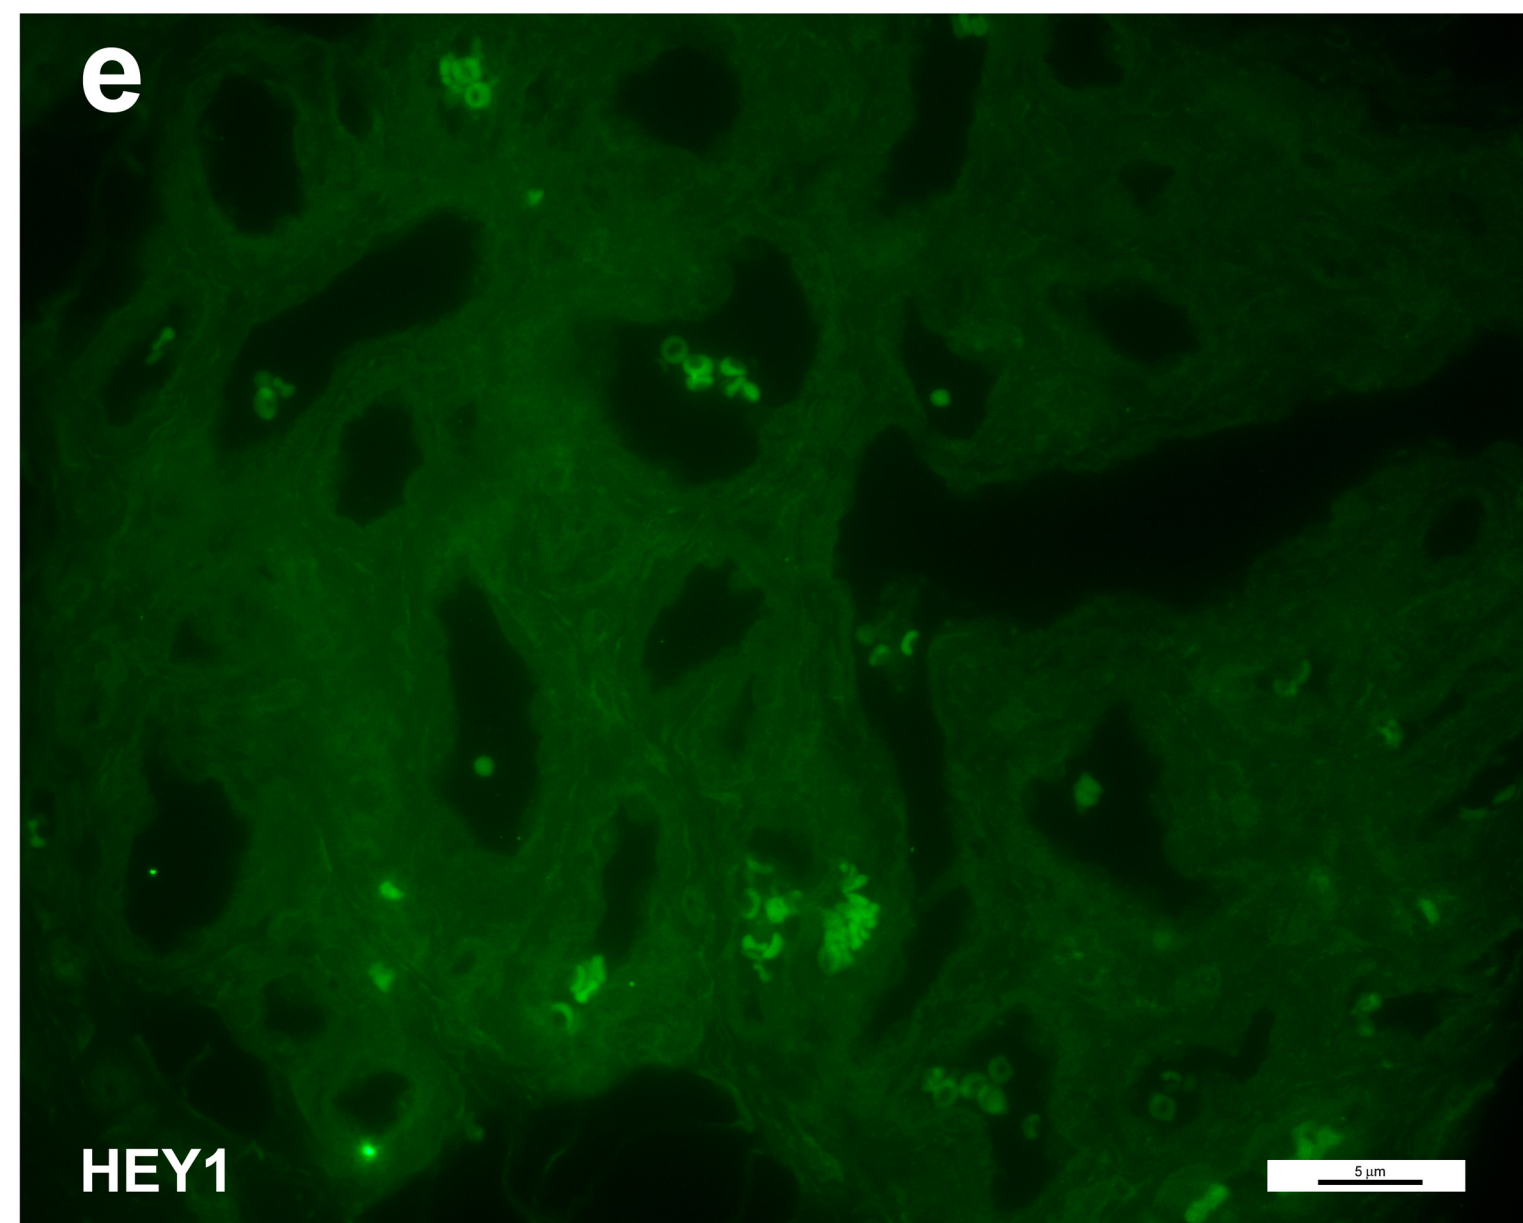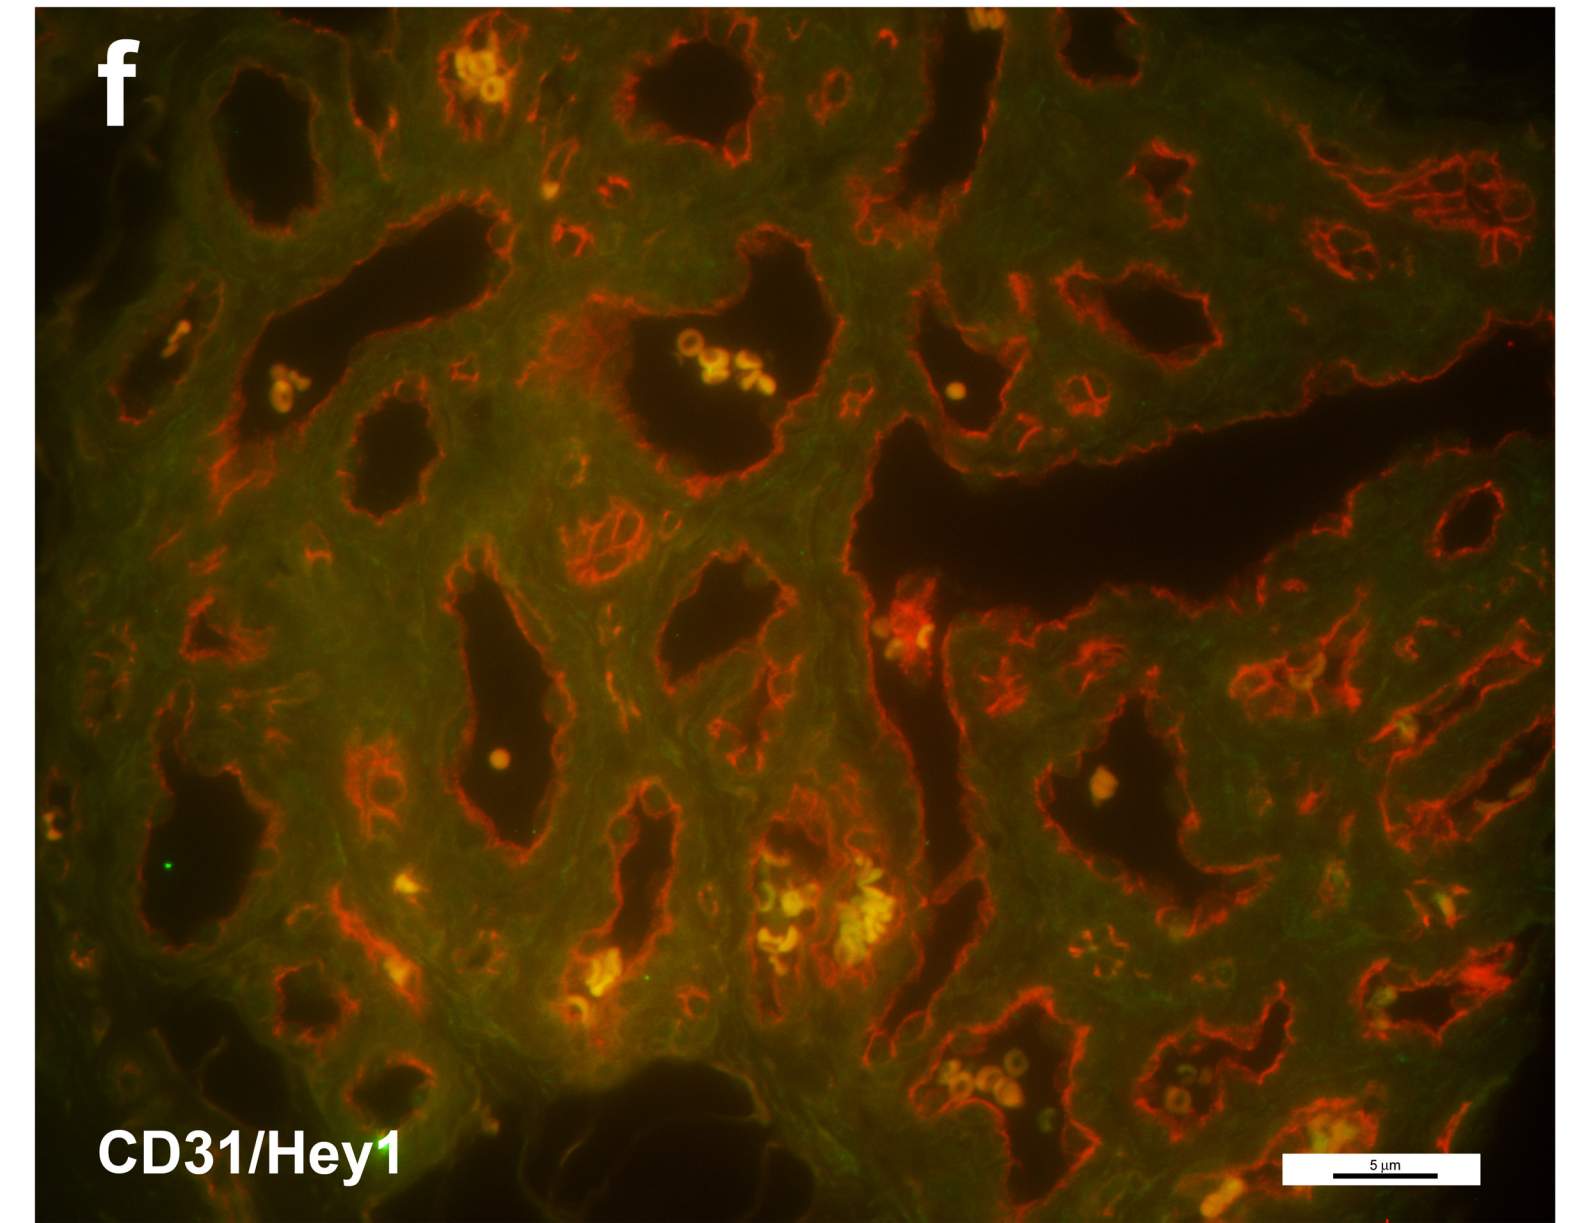

Supplement: MOESM4 [file 9680778]
